# Supplementary material for: Phosphine oxides as NMR and IR spectroscopic probes for the estimation of the geometry and energy of PO⋯H–A hydrogen bonds
Source: Royal Society of Chemistry journal article supplement (doi:10.1039/d1cp05939d), 2022-01-01
Supplement: d1cp05939d1.pdf [file d1cp05939d1.pdf]

*Supporting information for*

**Phosphine oxides as NMR and IR spectroscopic probes for geometry and energy  
of PO...H–A hydrogen bonds**

M.A. Kostin,<sup>1</sup> S.A. Pylaeva,<sup>2</sup> P.M. Tolstoy<sup>3,\*</sup>

<sup>1</sup> Department of Physics, St.Petersburg State University, St. Petersburg, Russia

<sup>2</sup> Chair of Theoretical Chemistry, University of Paderborn, Paderborn, Germany

<sup>3</sup> Institute of Chemistry, St.Petersburg State University, St. Petersburg, Russia

\* corresponding author, [peter.tolstoy@spbu.ru](mailto:peter.tolstoy@spbu.ru)

| <b>Contents</b>                                                                                                                                                                           | <b>Page</b> |
|-------------------------------------------------------------------------------------------------------------------------------------------------------------------------------------------|-------------|
| <b>Text 1</b> Computational details for calculations in the gas phase                                                                                                                     | <b>S3</b>   |
| <b>Figure S1</b> The complexes of Me <sub>3</sub> PO in the gas phase: distribution diagrams of angles $\alpha$ and $\beta$                                                               | <b>S3</b>   |
| <b>Figure S2</b> The complexes of Me <sub>3</sub> PO in the gas phase: correlation $q_2(q_1)$                                                                                             | <b>S4</b>   |
| <b>Figure S3</b> The complexes of Me <sub>3</sub> PO in the gas phase: correlation $\Delta E(G)$                                                                                          | <b>S4</b>   |
| <b>Figure S4</b> The complexes of Me <sub>3</sub> PO in the gas phase: correlation $\Delta E(V)$                                                                                          | <b>S5</b>   |
| <b>Figure S5</b> The complexes of Me <sub>3</sub> PO in the gas phase: correlation $G(V)$                                                                                                 | <b>S5</b>   |
| <b>Figure S6</b> The complexes of Me <sub>3</sub> PO in the gas phase: correlations $\Delta E( \Delta \nu_{P=O} )$ and $G( \Delta \nu_{P=O} )$                                            | <b>S6</b>   |
| <b>Figure S7</b> The complexes of Me <sub>3</sub> PO in the gas phase: correlations $\Delta E(\Delta\delta H)$ and $G(\Delta\delta H)$                                                    | <b>S7</b>   |
| <b>Figure S8</b> The complexes of Me <sub>3</sub> PO in the gas phase: correlations $\Delta E(\Delta\delta P)$ , $G(\Delta\delta P)$ and $V(\Delta\delta P)$ .                            | <b>S8</b>   |
| <b>Figure S9</b> The complexes of Me <sub>3</sub> PO in the gas phase: correlation between $ \Delta \nu_{P=O} $ and $\Delta\delta P$                                                      | <b>S9</b>   |
| <b>Figure S10</b> The complex Me <sub>3</sub> PO $\cdots$ Me <sub>3</sub> PO in aprotic medium                                                                                            | <b>S9</b>   |
| <b>Table S1</b> Calculations at various levels of theory and using various basis sets: geometric, energetic and spectroscopic parameters calculated for selected set of studied complexes | <b>S10</b>  |
| <b>Figure S11</b> Calculations at various levels of theory and using various basis sets: correlation between $q_2$ and $q_1$                                                              | <b>S13</b>  |
| <b>Figure S12</b> Calculations at various levels of theory and using various basis sets: correlation between $\Delta E$ and $\Delta\delta H$                                              | <b>S14</b>  |
| <b>Figure S13</b> Calculations at various levels of theory and using various basis sets: correlation between $\Delta E$ and $\Delta\delta P$                                              | <b>S14</b>  |
| <b>Figure S14</b> Calculations at various levels of theory and using various basis sets: correlation between $ \Delta \nu_{P=O} $ and $\Delta\delta P$                                    | <b>S15</b>  |
| <b>Table S2</b> Additional parameters for studied complexes <b>1-70</b> in aprotic medium                                                                                                 | <b>S16</b>  |
| <b>Figure S15</b> The complexes of Me <sub>3</sub> PO in aprotic medium: correlation $\Delta E(V)$                                                                                        | <b>S17</b>  |
| <b>Figure S16</b> The complexes of Me <sub>3</sub> PO in aprotic medium: correlation between $ \Delta \nu_{P=O} $ and $\Delta\delta P$                                                    | <b>S17</b>  |
| <b>Figure S17</b> The complexes of Me <sub>3</sub> PO in aprotic medium: $\Delta\delta P$ and $pK_a$ for NH, NH <sup>+</sup> and CH proton donors                                         | <b>S18</b>  |
| <b>Figure S18</b> The complexes of Me <sub>3</sub> PO in aprotic medium: correlation $V(\Delta \nu_{P=O})$                                                                                | <b>S18</b>  |
| <b>Figure S19</b> The complexes of Me <sub>3</sub> PO in aprotic medium: correlation $V(\Delta\delta H)$                                                                                  | <b>S19</b>  |
| <b>Figure S20</b> The complexes of Me <sub>3</sub> PO in aprotic medium: correlation between $ \Delta \nu_{P=O} $ and $\Delta\delta H$                                                    | <b>S19</b>  |
| <b>Figure S21</b> The complexes of Me <sub>3</sub> PO in aprotic medium: correlation between $\Delta\delta H$ and $\Delta\delta P$                                                        | <b>S20</b>  |

Optimized geometries (tight convergence criteria), energies and harmonic vibration frequencies were calculated using the same level of theory that was used for the PCM calculations, discussed in the main text (B3LYP/6-311++G(d,p)). The complexation energy  $\Delta E$  was computed as the energy needed to separate interacting molecules to an infinite distance, including the relaxation energy of monomers and basis set superposition error (BSSE; accounted for by counterpoise method applied to optimized geometry) and not including the dispersion correction. The NMR shielding constants were calculated using the same approach and the same level of theory that were described in main text for calculations in aprotic medium. The P=O stretching vibrational frequencies are reported relative to that in free Me<sub>3</sub>PO molecule,  $\nu_{\text{P=O}} = 1204.35 \text{ cm}^{-1}$ .

**Text 1.** Computational details for calculations in the gas phase.

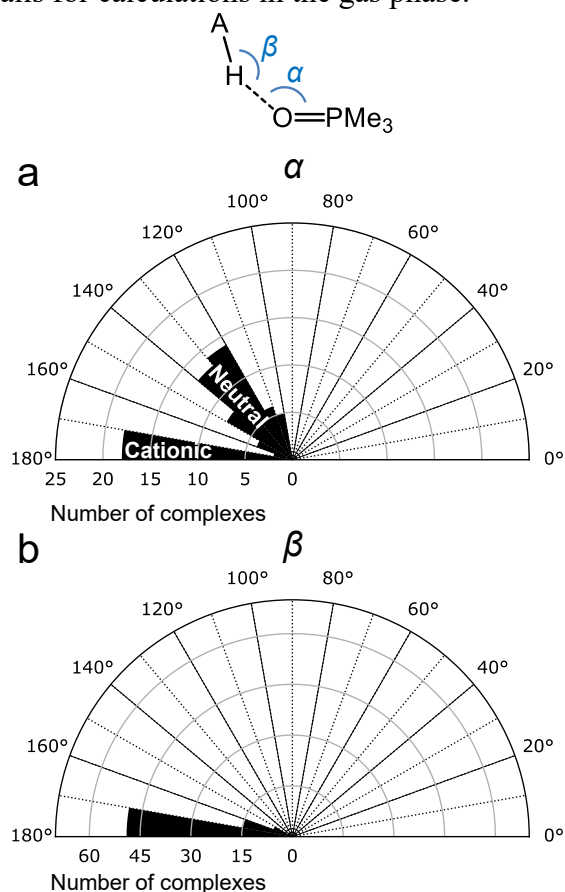

**Figure S1.** The complexes of Me<sub>3</sub>PO in the gas phase: distribution diagrams of valence angles  $\alpha$  (a) and  $\beta$  (b) in investigated complexes of Me<sub>3</sub>PO with proton donor molecules.

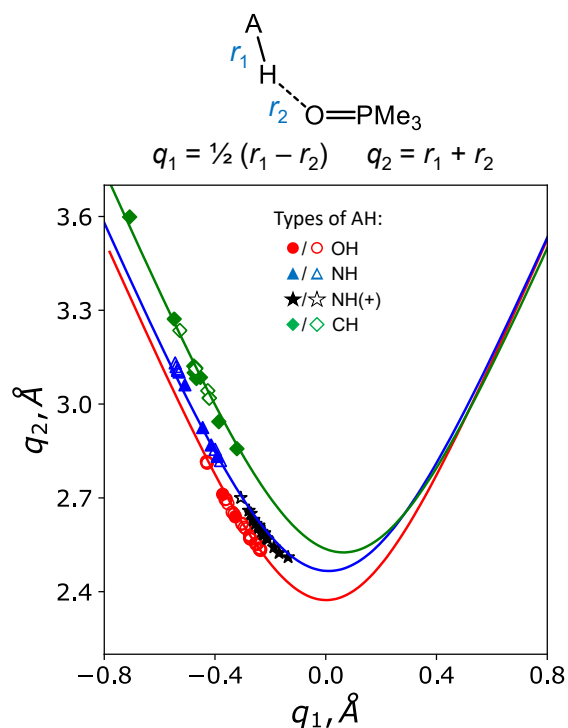

**Figure S2.** The complexes of  $\text{Me}_3\text{PO}$  in the gas phase: correlation between  $q_2$  and  $q_1$  natural coordinates of hydrogen bond in complexes. The solid lines correspond to **Eqs. 1–3**. For more details see text.

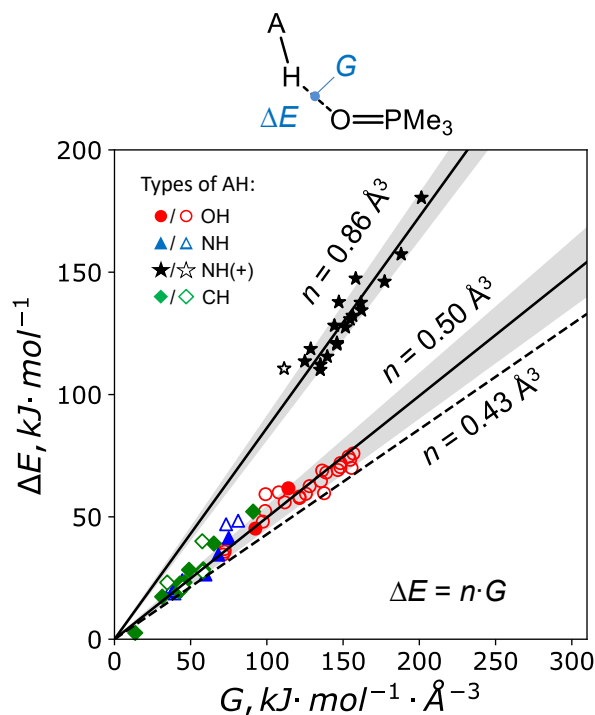

**Figure S3.** The complexes of  $\text{Me}_3\text{PO}$  in the gas phase: correlation between hydrogen bond energy  $\Delta E$  and local electron kinetic energy density  $G$ . Solid lines correspond to equation  $\Delta E = n \cdot G$ . The coefficient  $n$  is different for complexes with cationic  $n = (0.86 \pm 0.04) \text{ \AA}^3$  and neutral AH molecules  $n = (0.43 \pm 0.04) \text{ \AA}^3$ . Grey areas indicate the standard error of fitted  $n$  values. Dashed line ( $n = 0.43 \text{ \AA}^3$ ) is built according to the literature data (M. V. Vener, A. N. Egorova, A. V. Churakov and V. G. Tsirelson, *J. Comput. Chem.*, 2012, **33**, 2303–2309; I. Mata, I. Alkorta, E. Espinosa and E. Molins, *Chem. Phys. Lett.*, 2011, **507**, 185–189).

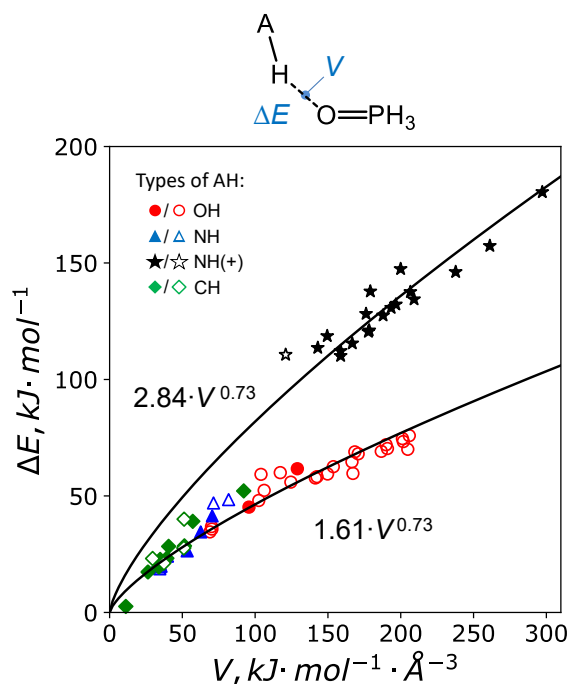

**Figure S4.** The complexes of Me<sub>3</sub>PO in the gas phase: correlation between hydrogen bond energy  $\Delta E$  and local electron potential energy density  $V$ . Solid lines correspond to the result of least squares fitting of data points by the functions  $\Delta E = k \cdot V^{0.73}$ . The coefficient  $k$  is different for complexes with cationic and neutral AH molecules. The power equal to 0.73 was fixed.

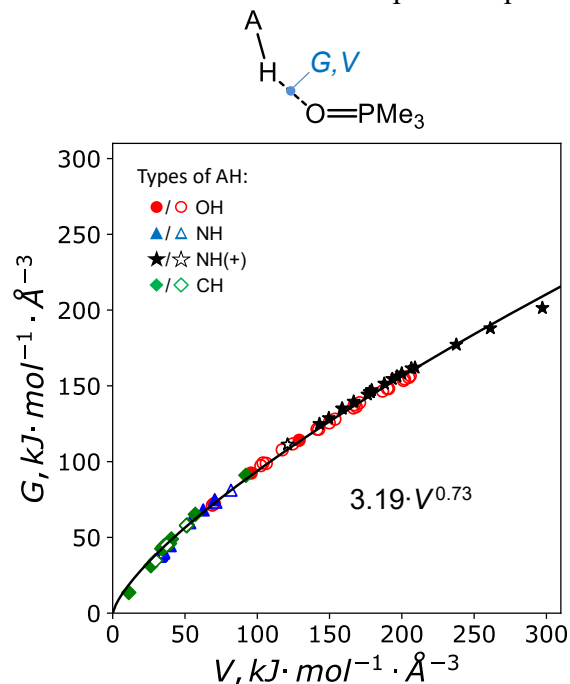

**Figure S5.** The complexes of Me<sub>3</sub>PO in the gas phase: correlation between local electron kinetic energy density  $G$  and local electron potential energy density  $V$ . Solid line corresponds to the result of least squares fitting of data points by the function  $G = k \cdot V^d$  for both complexes with neutral and cationic AH molecules.

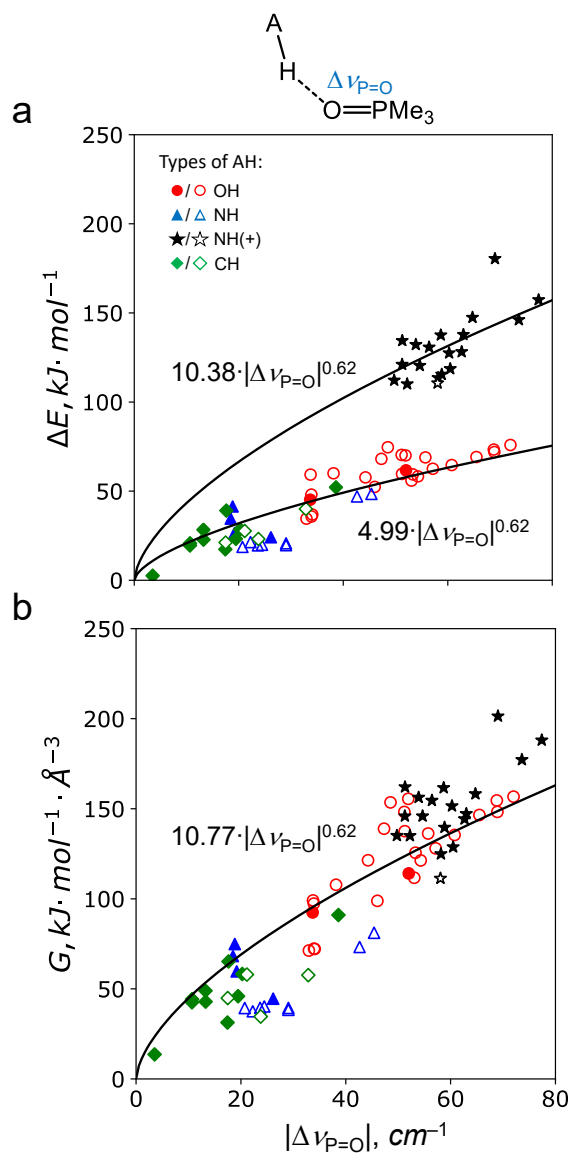

**Figure S6.** The complexes of Me<sub>3</sub>PO in the gas phase: correlations  $\Delta E(|\Delta \nu_{P=O}|)$  (a) and  $G(|\Delta \nu_{P=O}|)$  (b). Solid lines correspond to the results of least squares fitting of data points by the power functions. The power equal to 0.62 was fixed. The correlation  $\Delta E(|\Delta \nu_{P=O}|)$  is different for complexes with cationic and neutral AH molecules. The correlation  $G(|\Delta \nu_{P=O}|)$  is the same for both complexes with neutral and cationic molecules.

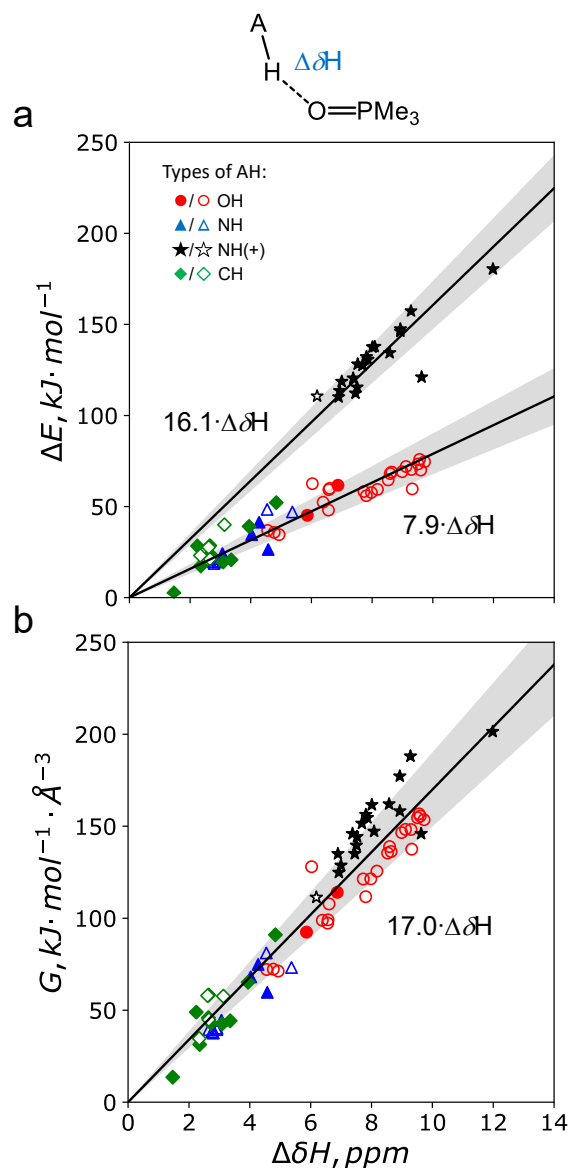

**Figure S7.** The complexes of Me<sub>3</sub>PO in the gas phase: correlations  $\Delta E(\Delta\delta H)$  (a) and  $G(\Delta\delta H)$  (b). Solid lines correspond to the results of least squares fitting of data points by the linear functions. The correlation  $\Delta E(\Delta\delta H)$  is different for complexes with cationic and neutral AH molecules. The correlation  $G(\Delta\delta H)$  is the same for both complexes with neutral and cationic molecules. Grey areas indicate the standard error of fitted values.

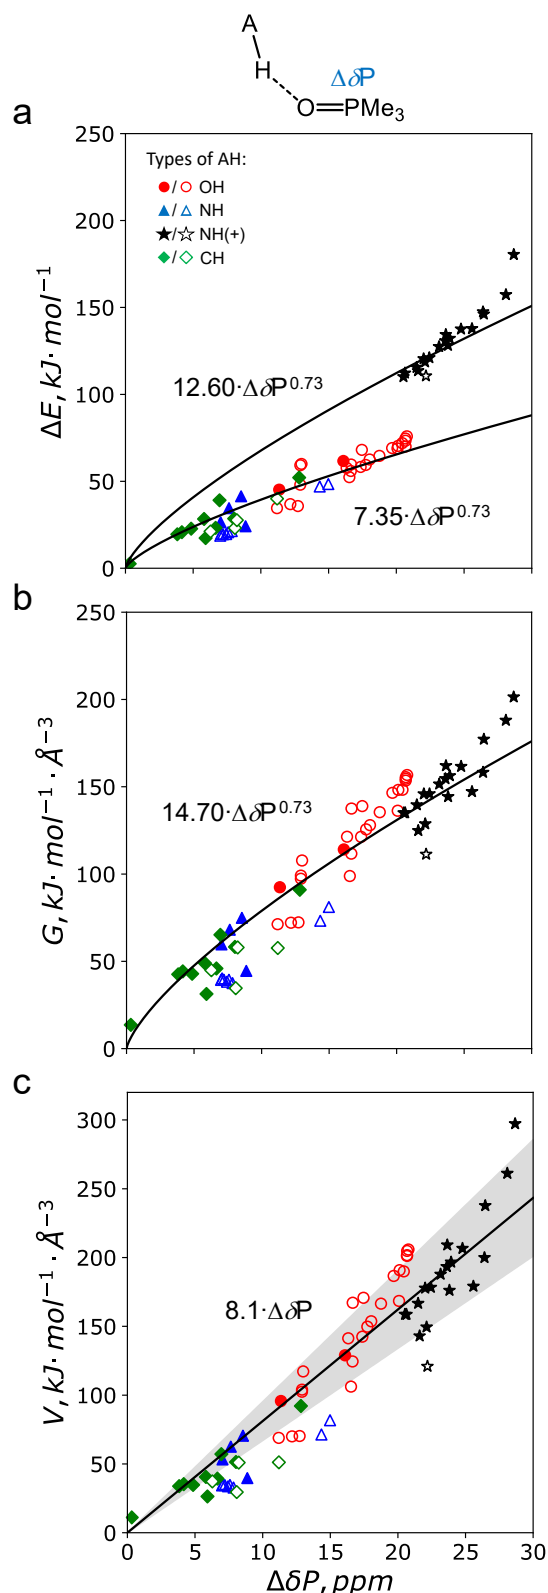

**Figure S8.** The complexes of  $\text{Me}_3\text{PO}$  in the gas phase: correlations between  $\Delta\delta\text{P}$  and hydrogen bond energy  $\Delta E$  (a), local electron kinetic energy density  $G$  (b) and local electron potential energy density  $V$  (c). Solid lines correspond to the results of least squares fitting of data points. The correlation between  $V$  and  $\Delta\delta\text{P}$  is linear. The fitting of correlations  $\Delta E(\Delta\delta\text{P})$  and  $G(\Delta\delta\text{P})$  are performed by the power functions  $\Delta E = a \cdot \Delta\delta\text{P}^{0.73}$  and  $G = b \cdot \Delta\delta\text{P}^{0.73}$ . The power equal to 0.73 was fixed due to correlation  $\Delta E(G)$  (Figure S3) and  $G(V)$  (Figure S5). Grey area indicates the standard error of fitted values.



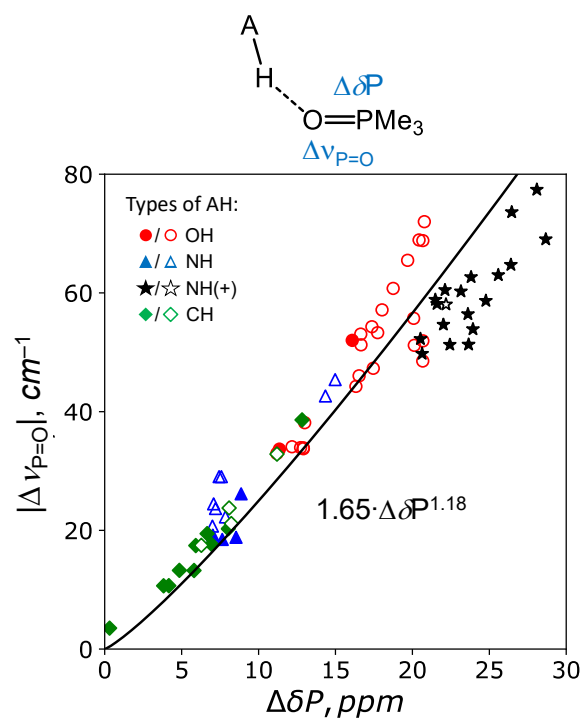

**Figure S9.** The complexes of  $\text{Me}_3\text{PO}$  in the gas phase: correlation between  $|\Delta\nu_{\text{P}=\text{O}}|$  and  $\Delta\delta\text{P}$ . Solid line corresponds to the function obtained as the results of least squares fitting of correlations  $G(|\Delta\nu_{\text{P}=\text{O}}|)$  shown in Figure S6 and  $G(\Delta\delta\text{P})$  shown in Figure S8. Correlation between  $|\Delta\nu_{\text{P}=\text{O}}|$  and  $\Delta\delta\text{P}$  is same for both complexes with cationic and neutral AH molecules.

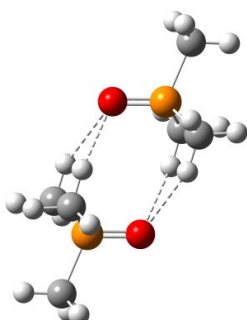

**Figure S10.** The structure  $\text{Me}_3\text{PO}\cdots\text{Me}_3\text{PO}$  in aprotic medium (chloroform).

**Table S1.** Calculations at different levels of theory: geometric, energetic and spectroscopic parameters for some studied complexes in aprotic medium. Theory levels used: M062X/6-311++G(d,p), B3LYP/aug-cc-pVDZ, MP2/aug-cc-pVDZ and B3LYP/6-311++G(d,p) with Grimme's D3 dispersion correction.<sup>a</sup> The numerical values are given in the following units:  $\Delta E$  in  $\text{kJ mol}^{-1}$ ,  $G$  in  $\text{kJ mol}^{-1} \text{ \AA}^{-3}$ ,  $q_1 = 0.5 \cdot (r_1 - r_2)$  and  $q_2 = r_1 + r_2$  in  $\text{\AA}$ ,  $\alpha$  and  $\beta$  in degrees,  $\Delta\delta\text{H}$  and  $\Delta\delta\text{P}$  in ppm and  $\Delta\nu_{\text{P=O}}$  in  $\text{cm}^{-1}$ .

| Type of proton donor | No. | Proton donor molecule | Method/<br>basis set                | $\Delta E$ | $G$   | $q_1$  | $q_2$ | $\alpha$ | $\beta$ | $\Delta\delta\text{H}$ | $\Delta\delta\text{P}$ | $\Delta\nu$ |
|----------------------|-----|-----------------------|-------------------------------------|------------|-------|--------|-------|----------|---------|------------------------|------------------------|-------------|
| OH                   | 2   | Methanol              | B3LYP/<br>6-311++G(d,p)             | 35.80      | 72.3  | -0.429 | 2.811 | 110.8    | 160.7   | 4.8                    | 12.7                   | 33.9        |
|                      |     |                       | B3LYP/<br>6-311++G(d,p)<br>with GD3 | 34.81      | 69.8  | -0.438 | 2.830 | 103.2    | 155.1   | 4.7                    | 13.5                   | 37.5        |
|                      |     |                       | M062X/<br>6-311++G(d,p)             | 47.36      | 72.8  | -0.443 | 2.832 | 102.4    | 149.7   | 4.7                    | 13.1                   | 40.4        |
|                      |     |                       | B3LYP/<br>aug-cc-pVDZ               | 35.20      | 69.9  | -0.421 | 2.803 | 105.7    | 162.2   | 5.0                    | 12.0                   | 33.7        |
|                      |     |                       | MP2/<br>aug-cc-pVDZ                 | 27.43      | 74.8  | -0.419 | 2.804 | 100.2    | 158.9   | 4.9                    | 12.8                   | 34.8        |
|                      | 22  | Phenol                | B3LYP/<br>6-311++G(d,p)             | 45.21      | 92.4  | -0.372 | 2.712 | 130.4    | 172.7   | 5.9                    | 11.4                   | 33.7        |
|                      |     |                       | B3LYP/<br>6-311++G(d,p)<br>with GD3 | 36.74      | 91.7  | -0.377 | 2.726 | 119.4    | 160.6   | 5.7                    | 13.1                   | 42.0        |
|                      |     |                       | M062X/<br>6-311++G(d,p)             | 62.21      | 94.4  | -0.382 | 2.727 | 118.3    | 157.6   | 5.6                    | 13.5                   | 48.1        |
|                      |     |                       | B3LYP/<br>aug-cc-pVDZ               | 44.70      | 91.5  | -0.363 | 2.706 | 115.2    | 169.6   | 6.0                    | 12.7                   | 38.5        |
|                      |     |                       | MP2/<br>aug-cc-pVDZ                 | 10.74      | 91.1  | -0.375 | 2.736 | 110.7    | 155.1   | 5.0                    | 12.7                   | 45.2        |
|                      | 24  | 3-Nitrophenol         | B3LYP/<br>6-311++G(d,p)             | 59.27      | 99.1  | -0.353 | 2.682 | 150.2    | 175.3   | 10.6                   | 12.9                   | 33.8        |
|                      |     |                       | B3LYP/<br>6-311++G(d,p)<br>with GD3 | 53.98      | 107.0 | -0.339 | 2.663 | 131.4    | 169.1   | 6.9                    | 16.0                   | 46.7        |
|                      |     |                       | M062X/<br>6-311++G(d,p)             | 75.63      | 104.8 | -0.351 | 2.674 | 141.3    | 168.6   | 6.8                    | 16.4                   | 49.4        |
|                      |     |                       | B3LYP/<br>aug-cc-pVDZ               | 56.50      | 99.0  | -0.343 | 2.671 | 141.1    | 178.7   | 6.6                    | 14.5                   | 37.0        |
|                      |     |                       | MP2/<br>aug-cc-pVDZ                 | 35.15      | 115.5 | -0.320 | 2.643 | 116.9    | 168.1   | 7.2                    | 17.1                   | 50.4        |

|                 |    |                     |                                     |        |       |        |       |       |       |      |      |      |
|-----------------|----|---------------------|-------------------------------------|--------|-------|--------|-------|-------|-------|------|------|------|
| NH              | 34 | Pyrrole             | B3LYP/<br>6-311++G(d,p)             | 34.58  | 68.1  | -0.414 | 2.869 | 143.4 | 175.1 | 11.5 | 7.6  | 18.5 |
|                 |    |                     | B3LYP/<br>6-311++G(d,p)<br>with GD3 | 28.82  | 62.5  | -0.443 | 2.928 | 112.3 | 151.6 | 3.7  | 11.5 | 33.6 |
|                 |    |                     | M062X/<br>6-311++G(d,p)             | 48.39  | 63.2  | -0.458 | 2.954 | 115.0 | 140.6 | 3.3  | 10.7 | 33.0 |
|                 |    |                     | B3LYP/<br>aug-cc-pVDZ               | 33.11  | 63.8  | -0.413 | 2.877 | 121.4 | 170.3 | 4.0  | 9.6  | 26.8 |
|                 |    |                     | MP2/<br>aug-cc-pVDZ                 | 11.86  | 68.5  | -0.417 | 2.893 | 109.6 | 147.6 | 3.8  | 12.0 | 34.5 |
|                 | 35 | Imidazole           | B3LYP/<br>6-311++G(d,p)             | 41.40  | 74.9  | -0.392 | 2.833 | 149.5 | 176.7 | 12.4 | 8.5  | 18.8 |
|                 |    |                     | B3LYP/<br>6-311++G(d,p)<br>with GD3 | 34.45  | 72.6  | -0.408 | 2.867 | 115.5 | 155.4 | 4.2  | 12.3 | 35.6 |
|                 |    |                     | M062X/<br>6-311++G(d,p)             | 50.17  | 69.2  | -0.436 | 2.916 | 117.0 | 141.7 | 3.6  | 11.5 | 34.8 |
|                 |    |                     | B3LYP/<br>aug-cc-pVDZ               | 39.60  | 71.2  | -0.389 | 2.833 | 135.6 | 176.5 | 4.2  | 9.9  | 24.3 |
|                 |    |                     | MP2/<br>aug-cc-pVDZ                 | 22.64  | 79.8  | -0.380 | 2.830 | 107.8 | 157.6 | 4.6  | 13.8 | 38.0 |
|                 | 37 | 1,4-Dihydropyrazine | B3LYP/<br>6-311++G(d,p)             | 26.43  | 59.7  | -0.444 | 2.925 | 137.3 | 174.2 | 5.9  | 7.0  | 19.2 |
|                 |    |                     | B3LYP/<br>6-311++G(d,p)<br>with GD3 | 22.44  | 54.8  | -0.473 | 2.983 | 106.1 | 152.9 | 3.9  | 10.1 | 28.6 |
|                 |    |                     | M062X/<br>6-311++G(d,p)             | 39.50  | 51.1  | -0.510 | 3.052 | 106.4 | 136.0 | 3.5  | 9.3  | 32.7 |
|                 |    |                     | B3LYP/<br>aug-cc-pVDZ               | 24.62  | 53.4  | -0.454 | 2.953 | 114.2 | 166.5 | 4.1  | 9.2  | 25.0 |
|                 |    |                     | MP2/<br>aug-cc-pVDZ                 | 8.15   | 63.3  | -0.437 | 2.927 | 101.3 | 155.7 | 5.1  | 11.8 | 30.3 |
| NH <sup>+</sup> | 39 | Dimethylammonium    | B3LYP/<br>6-311++G(d,p)             | 147.44 | 158.2 | -0.221 | 2.587 | 174.8 | 177.5 | 13.2 | 26.4 | 64.7 |
|                 |    |                     | B3LYP/<br>6-311++G(d,p)<br>with GD3 | 146.98 | 164.3 | -0.214 | 2.575 | 171.1 | 173.6 | 9.2  | 26.0 | 60.9 |
|                 |    |                     | M062X/<br>6-311++G(d,p)             | 154.23 | 176.5 | -0.199 | 2.555 | 166.0 | 168.2 | 10.0 | 27.5 | 72.8 |
|                 |    |                     | B3LYP/<br>aug-cc-pVDZ               | 144.02 | 159.0 | -0.220 | 2.591 | 161.2 | 171.6 | 8.8  | 24.8 | 64.1 |

|    |                |                  |                                     |                                     |       |        |        |       |       |       |      |      |      |
|----|----------------|------------------|-------------------------------------|-------------------------------------|-------|--------|--------|-------|-------|-------|------|------|------|
|    |                |                  | MP2/<br>aug-cc-pVDZ                 | 134.40                              | 203.7 | -0.219 | 2.587  | 150.7 | 163.5 | 8.9   | 25.5 | 67.9 |      |
| 44 | 3-Picolinium   |                  | B3LYP/<br>6-311++G(d,p)             | 132.21                              | 156.3 | -0.223 | 2.582  | 176.6 | 178.8 | 17.9  | 23.9 | 53.9 |      |
|    |                |                  | B3LYP/<br>6-311++G(d,p)<br>with GD3 | 131.95                              | 161.4 | -0.217 | 2.572  | 173.2 | 177.1 | 8.0   | 23.3 | 51.0 |      |
|    |                |                  | M062X/<br>6-311++G(d,p)             | 139.45                              | 178.5 | -0.192 | 2.543  | 168.0 | 173.8 | 8.8   | 25.1 | 66.0 |      |
|    |                |                  | B3LYP/<br>aug-cc-pVDZ               | 128.38                              | 157.8 | -0.221 | 2.585  | 157.4 | 170.3 | 7.8   | 22.4 | 60.3 |      |
|    |                |                  | MP2/<br>aug-cc-pVDZ                 | 120.09                              | 229.2 | -0.200 | 2.562  | 147.7 | 166.0 | 8.1   | 24.0 | 66.5 |      |
| 47 | 2,6-Lutidinium |                  | B3LYP/<br>6-311++G(d,p)             | 118.65                              | 128.7 | -0.270 | 2.650  | 173.2 | 177.2 | 16.6  | 22.1 | 60.5 |      |
|    |                |                  | B3LYP/<br>6-311++G(d,p)<br>with GD3 | 117.41                              | 140.3 | -0.254 | 2.621  | 165.2 | 175.0 | 7.4   | 22.1 | 57.5 |      |
|    |                |                  | M062X/<br>6-311++G(d,p)             | 131.33                              | 152.3 | -0.237 | 2.598  | 165.2 | 176.4 | 7.9   | 23.7 | 68.2 |      |
|    |                |                  | B3LYP/<br>aug-cc-pVDZ               | 115.31                              | 129.6 | -0.269 | 2.648  | 175.2 | 178.7 | 6.8   | 20.2 | 50.7 |      |
|    |                |                  | MP2/<br>aug-cc-pVDZ                 | 104.72                              | 204.1 | -0.218 | 2.586  | 144.6 | 173.0 | 8.1   | 24.1 | 68.4 |      |
| CH | 60             | Fluoroacetylene  |                                     | B3LYP/<br>6-311++G(d,p)             | 20.75 | 44.2   | -0.467 | 3.082 | 148.4 | 176.8 | 4.1  | 4.2  | 10.7 |
|    |                |                  |                                     | B3LYP/<br>6-311++G(d,p)<br>with GD3 | 17.82 | 42.7   | -0.485 | 3.119 | 114.6 | 159.7 | 3.4  | 6.2  | 16.2 |
|    |                |                  |                                     | M062X/<br>6-311++G(d,p)             | 24.64 | 49.7   | -0.452 | 3.055 | 146.2 | 175.1 | 3.5  | 5.2  | 12.3 |
|    |                |                  |                                     | B3LYP/<br>aug-cc-pVDZ               | 19.83 | 41.6   | -0.462 | 3.088 | 143.1 | 179.7 | 3.2  | 4.9  | 10.2 |
|    |                |                  |                                     | MP2/<br>aug-cc-pVDZ                 | 12.45 | 43.8   | -0.468 | 3.111 | 103.0 | 163.2 | 3.6  | 8.2  | 19.4 |
|    | 61             | Hydrogen cyanide |                                     | B3LYP/<br>6-311++G(d,p)             | 39.11 | 65.2   | -0.386 | 2.944 | 156.5 | 177.3 | 6.3  | 6.9  | 17.6 |
|    |                |                  |                                     | B3LYP/<br>6-311++G(d,p)<br>with GD3 | 12.54 | 68.5   | -0.378 | 2.930 | 145.4 | 174.9 | 4.2  | 7.1  | 18.0 |
|    |                |                  |                                     | M062X/<br>6-311++G(d,p)             | 42.70 | 68.7   | -0.384 | 2.938 | 155.0 | 176.0 | 3.9  | 7.7  | 18.7 |

|    |         |                                     |       |      |        |       |       |       |     |     |      |
|----|---------|-------------------------------------|-------|------|--------|-------|-------|-------|-----|-----|------|
|    |         | B3LYP/<br>aug-cc-pVDZ               | 37.79 | 61.4 | -0.380 | 2.948 | 156.3 | 179.9 | 3.7 | 6.6 | 16.0 |
|    |         | MP2/<br>aug-cc-pVDZ                 | 35.64 | 61.9 | -0.377 | 2.952 | 119.0 | 171.7 | 4.1 | 9.3 | 27.0 |
| 68 | Methane | B3LYP/<br>6-311++G(d,p)             | 2.58  | 13.6 | -0.708 | 3.598 | 179.3 | 179.8 | 1.6 | 0.3 | 3.5  |
|    |         | B3LYP/<br>6-311++G(d,p)<br>with GD3 | -0.91 | 15.4 | -0.715 | 3.612 | 101.6 | 156.6 | 1.5 | 1.2 | 3.0  |
|    |         | M062X/<br>6-311++G(d,p)             | 4.72  | 18.7 | -0.645 | 3.470 | 178.0 | 179.4 | 1.7 | 0.9 | 4.7  |
|    |         | B3LYP/<br>aug-cc-pVDZ               | 2.43  | 14.9 | -0.707 | 3.608 | 178.6 | 179.8 | 1.2 | 1.4 | 2.1  |
|    |         | MP2/<br>aug-cc-pVDZ                 | -3.93 | 17.7 | -0.702 | 3.602 | 95.9  | 164.7 | 1.4 | 2.6 | 3.8  |

<sup>a</sup> – S. Grimme, J. Antony, S. Ehrlich and H. Krieg, *J. Chem. Phys.*, 2010, **132**, 154104.

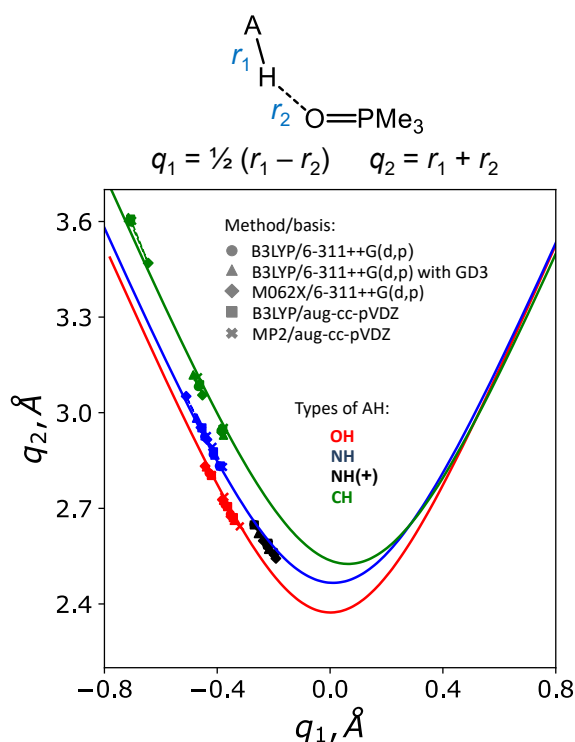

**Figure S11.** Calculations at various levels of theory and using various basis sets: correlations between  $q_2$  and  $q_1$  natural coordinates of hydrogen bond for selected set of studied complexes (see **Table S1**). The solid lines correspond to **Eqs. 1–3**. The set of points related to result of calculations for the same complex are connected by the dashed lines.

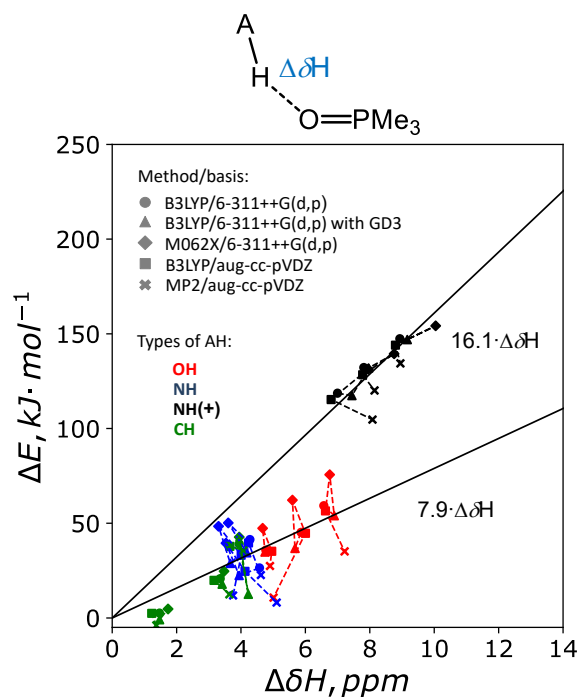

**Figure S12.** Calculations at various levels of theory and using various basis sets: correlation between  $\Delta E$  and  $\Delta\delta H$  for selected set of studied complexes (see **Table S1**). Solid lines correspond to the results of least squares fitting of data points shown in Figure S7. The correlation between  $\Delta E$  and  $\Delta\delta H$  is different for complexes with cationic and neutral AH molecules. The set of points related to result of calculations for the same complex are connected by the dashed lines.

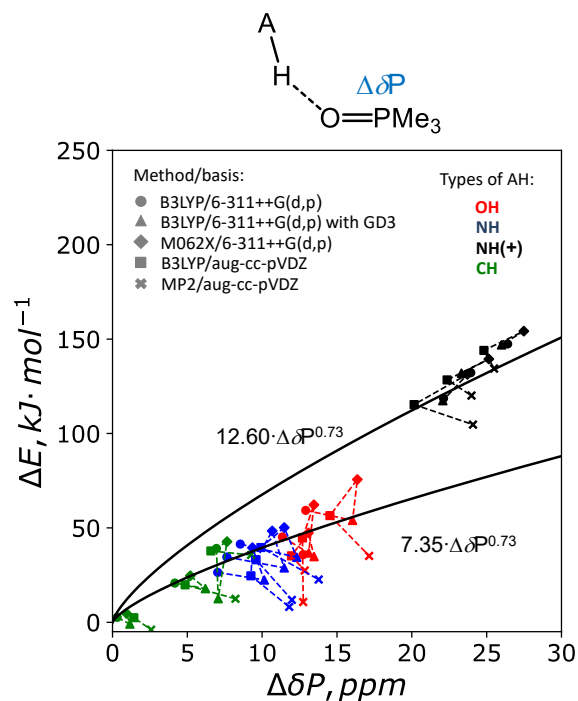

**Figure S13.** Calculations at various levels of theory and using various basis sets: correlation between  $\Delta E$  and  $\Delta\delta P$  for selected set of studied complexes (see **Table S1**). Solid lines correspond to the results of least squares fitting of data points shown in Figure S8. The set of points related to result of calculations for the same complex are connected by the dashed lines. The correlation is different for complexes with cationic and neutral AH molecules.

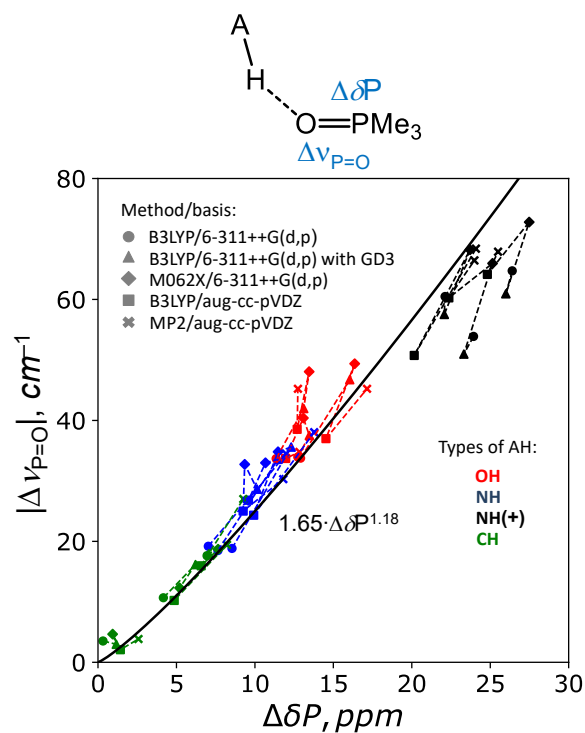

**Figure S14.** Calculations at various levels of theory and using various basis sets: correlation between  $|\Delta\nu_{\text{P}=\text{O}}|$  and  $\Delta\delta\text{P}$  for selected set of studied complexes (see **Table S1**). The solid line corresponds to the results of least squares fitting of data points shown in Figure S9. The set of points related to result of calculations for the same complex are connected by the dashed lines. The correlation is the same for complexes with cationic and neutral AH molecules.

**Table S2.** Additional parameters for complexes 1–70 in aprotic medium (chloroform): electron density  $\rho$  in atomic unit ( $|e|\cdot\text{Bohr}^{-3}$ ), Laplacian of electron density  $\Delta\rho$  in Hartree. The last column contains references to the literature value of  $pK_a$ .

| Type of proton donor | No. | Proton donor molecule         | $\rho$            | $\Delta\rho$ | References to $pK_a$                                                                                               |
|----------------------|-----|-------------------------------|-------------------|--------------|--------------------------------------------------------------------------------------------------------------------|
| OH                   | 1   | Water                         | 0.0360            | 0.1286       | T. Silverstein and S. Heller, <i>J. Chem. Educ.</i> , <b>2017</b> , 94, 690–695.                                   |
|                      | 2   | Methanol                      | 0.0365            | 0.1306       | P. Ballinger and F. Long, <i>J. Am. Chem. Soc.</i> , <b>1960</b> , 82, 795–798.                                    |
|                      | 3   | Fluoromethanol                | 0.0481            | 0.1522       | –                                                                                                                  |
|                      | 4   | Difluoromethanol              | 0.0602            | 0.1617       | –                                                                                                                  |
|                      | 5   | Trifluoromethanol             | 0.0775            | 0.1672       | –                                                                                                                  |
|                      | 6   | Chloromethanol                | 0.0536            | 0.1595       | –                                                                                                                  |
|                      | 7   | Dichloromethanol              | 0.0694            | 0.1687       | –                                                                                                                  |
|                      | 8   | Ethanol                       | 0.0353            | 0.1281       | D. DeTar, <i>J. Am. Chem. Soc.</i> , <b>1982</b> , 104, 7205–7212                                                  |
|                      | 9   | 2,2,2-Trifluoroethanol        | 0.0459            | 0.1493       | J. Suh, D. Koh and C. Min, <i>J. Org. Chem.</i> , <b>1988</b> , 53, 1147–1153                                      |
|                      | 10  | Formic acid                   | 0.0629            | 0.1603       | M. Kim, C. Kim, H. Lee and K. Kim, <i>J. Chem. Soc. Faraday Trans.</i> , <b>1996</b> , 92, 4951–4956               |
|                      | 11  | Acetic acid                   | 0.0579            | 0.1566       | D. Barrón, S. Butí, M. Ruiz and J. Barbosa, <i>Phys. Chem. Chem. Phys.</i> , <b>1999</b> , 1, 295–298              |
|                      | 12  | Chloroacetic acid             | 0.0687            | 0.1633       | B. Chawla and S. Mehta, <i>J. Phys. Chem.</i> , <b>1984</b> , 88, 2650–2655                                        |
|                      | 13  | Dichloroacetic acid           | 0.0759            | 0.1631       | B. Chawla and S. Mehta, <i>J. Phys. Chem.</i> , <b>1984</b> , 88, 2650–2655                                        |
|                      | 14  | Trichloroacetic acid          | 0.0830            | 0.1601       | –                                                                                                                  |
|                      | 15  | Trifluoroacetic acid          | 0.0856            | 0.1579       | Z. Pawelka and M. Haulait-Pirson, <i>J. Phys. Chem.</i> , <b>1981</b> , 85, 1052–1057                              |
|                      | 16  | Benzoic acid                  | 0.0602            | 0.1583       | N. McHedlov-Petrosyan and R. Mayorga, <i>J. Chem. Soc. Faraday Trans.</i> , <b>1992</b> , 88, 3025–3032            |
|                      | 17  | Pentafluorobenzoic acid       | 0.0734            | 0.1635       | N. McHedlov-Petrosyan and R. Mayorga, <i>J. Chem. Soc. Faraday Trans.</i> , <b>1992</b> , 88, 3025–3032            |
|                      | 18  | Methanesulfonic acid          | 0.0852            | 0.1555       | J. Guthrie, <i>Can. J. Chem.</i> , <b>1978</b> , 56, 2342–2354                                                     |
|                      | 19  | Benzenesulfonic acid          | 0.0896            | 0.1513       | J. Guthrie, <i>Can. J. Chem.</i> , <b>1978</b> , 56, 2342–2354                                                     |
|                      | 20  | p-Toluenesulfonic acid        | 0.0911            | 0.1484       | –                                                                                                                  |
|                      | 21  | Phenylphosphonic acid         | 0.0672            | 0.1616       | H. Jaffé, L. Freedman and G. Doak, <i>J. Am. Chem. Soc.</i> , <b>1953</b> , 75, 2209–2211                          |
|                      | 22  | Phenol                        | 0.0459            | 0.1483       | G. Bouchard, P. Carrupt, B. Testa, V. Gobry and H. Girault, <i>Chem. Eur. J.</i> , <b>2002</b> , 8, 3478–3484      |
|                      | 23  | 2-Nitrophenol                 | 0.0560            | 0.1599       | W. Mock and L. Morsch, <i>Tetrahedron</i> , <b>2001</b> , 57, 2957–2964                                            |
|                      | 24  | 3-Nitrophenol                 | 0.0515            | 0.1588       | J. Llor, <i>J. Solution Chem.</i> , <b>1999</b> , 28, 1–20                                                         |
|                      | 25  | 4-Nitrophenol                 | 0.0550            | 0.1612       | W. Mock and L. Morsch, <i>Tetrahedron</i> , <b>2001</b> , 57, 2957–2964                                            |
| NH                   | 26  | Ammonia                       | 0.0195            | 0.0731       | –                                                                                                                  |
|                      | 27  | Dimethylamine                 | 0.0202            | 0.0768       | –                                                                                                                  |
|                      | 28  | Aziridine                     | 0.0229            | 0.0861       | S. Searles, M. Tamres, F. Block and L. Quarterman, <i>J. Am. Chem. Soc.</i> , <b>1956</b> , 78, 4917–4920          |
|                      | 29  | Azetidine                     | 0.0199            | 0.0740       | S. Searles, M. Tamres, F. Block and L. Quarterman, <i>J. Am. Chem. Soc.</i> , <b>1956</b> , 78, 4917–4920          |
|                      | 30  | Pyrrolidine                   | 0.0196            | 0.0719       | S. Searles, M. Tamres, F. Block and L. Quarterman, <i>J. Am. Chem. Soc.</i> , <b>1956</b> , 78, 4917–4920          |
|                      | 31  | Piperidine                    | 0.0196            | 0.0734       | S. Searles, M. Tamres, F. Block and L. Quarterman, <i>J. Am. Chem. Soc.</i> , <b>1956</b> , 78, 4917–4920          |
|                      | 32  | Piperazine                    | 0.0194            | 0.0723       | C. Bernasconi, J. Moreira, L. Huang and K. Kittredge, <i>J. Am. Chem. Soc.</i> , <b>1999</b> , 121, 1674–1680      |
|                      | 33  | 2-Pyrrolidone                 | 0.0312            | 0.1095       | –                                                                                                                  |
|                      | 34  | Pyrrole                       | 0.0326            | 0.1232       | A. Gervasini and A. Auroux, <i>J. Phys. Chem.</i> , <b>1993</b> , 97, 2628–2639                                    |
|                      | 35  | Imidazole                     | 0.0366            | 0.1349       | B. Barszcz, M. Gabryszewski, J. Kulig and B. Lenarcik, <i>J. Chem. Soc. Dalt. Trans.</i> , <b>1986</b> , 2025–2028 |
|                      | 36  | Pyrazole                      | 0.0377            | 0.1315       | B. Barszcz, M. Gabryszewski, J. Kulig and B. Lenarcik, <i>J. Chem. Soc. Dalt. Trans.</i> , <b>1986</b> , 2025–2028 |
|                      | 37  | 1,4-Dihydropyrazine           | 0.0277            | 0.1080       | –                                                                                                                  |
| NH <sup>+</sup>      | 38  | Ammonium                      | 0.0727            | 0.1577       | Y. Yan, E. Zeitler, J. Gu, Y. Hu and A. Bocarsly, <i>J. Am. Chem. Soc.</i> , <b>2013</b> , 135, 14020–14023        |
|                      | 39  | Dimethylammonium              | 0.0595            | 0.1649       | –                                                                                                                  |
|                      | 40  | Trimethylammonium             | 0.0575            | 0.1659       | –                                                                                                                  |
|                      | 41  | Imidazolium                   | 0.0629            | 0.1621       | S. Datta and A. Grzybowski, <i>J. Chem. Soc. B Phys. Org.</i> , <b>1966</b> , 136–140                              |
|                      | 42  | Pyridinium                    | 0.0650            | 0.1668       | A. Isao, U. Kikujiro and K. Hirono, <i>Bull. Chem. Soc. Jpn.</i> , <b>1982</b> , 55, 713–716                       |
|                      | 43  | 2-Picolinium                  | 0.0589            | 0.1651       | –                                                                                                                  |
|                      | 44  | 3-Picolinium                  | 0.0630            | 0.1669       | –                                                                                                                  |
|                      | 45  | 4-Picolinium                  | 0.0621            | 0.1653       | –                                                                                                                  |
|                      | 46  | 3,5-Lutidinium                | 0.0621            | 0.1659       | –                                                                                                                  |
|                      | 47  | 2,6-Lutidinium                | 0.0540            | 0.1603       | –                                                                                                                  |
|                      | 48  | 2,4,6-Collidinium             | 0.0528            | 0.1604       | –                                                                                                                  |
|                      | 49  | 2-(Dimethylamino)pyridinium   | 0.0465            | 0.1510       | –                                                                                                                  |
|                      | 50  | 3-(Dimethylamino)pyridinium   | 0.0594            | 0.1642       | –                                                                                                                  |
|                      | 51  | 4-(Dimethylamino)pyridinium   | 0.0532            | 0.1580       | C. Heo and J. Bunting, <i>J. Org. Chem.</i> , <b>1992</b> , 57, 3570–3578                                          |
|                      | 52  | 3,5-(Dimethylamino)pyridinium | 0.0560            | 0.1620       | –                                                                                                                  |
|                      | 53  | 3,4,5-(Trimethoxy)pyridinium  | 0.0576            | 0.1677       | –                                                                                                                  |
|                      | 54  | 3,4,5-Trifluoropyridinium     | 0.0839            | 0.1653       | –                                                                                                                  |
|                      | 55  | 3,4,5-Trichloropyridinium     | 0.0805            | 0.1675       | –                                                                                                                  |
|                      | 56  | 3,5-Aminopyridinium           | 0.0598            | 0.1641       | –                                                                                                                  |
|                      | CH  | 57                            | Trifluoroethylene | 0.0202       | 0.0803                                                                                                             |
| 58                   |     | Trichloroethylene             | 0.0208            | 0.0814       | –                                                                                                                  |
| 59                   |     | Acetylene                     | 0.0214            | 0.0862       | –                                                                                                                  |
| 60                   |     | Fluoroacetylene               | 0.0217            | 0.0896       | –                                                                                                                  |
| 61                   |     | Hydrogen cyanide              | 0.0344            | 0.1301       | K. Ang, <i>J. Chem. Soc.</i> , <b>1959</b> , 3822–3825                                                             |
| 62                   |     | Trinitromethane               | 0.0440            | 0.1469       | –                                                                                                                  |
| 63                   |     | 1,1-Dinitroethane             | 0.0271            | 0.1034       | J. Belew and L. Hepler, <i>J. Am. Chem. Soc.</i> , <b>1956</b> , 78, 4005–4007                                     |
| 64                   |     | 2-Nitropropane                | 0.0145            | 0.0473       | H. Gilbert, <i>J. Am. Chem. Soc.</i> , <b>1980</b> , 102, 7059–7065                                                |
| 65                   |     | Trichloromethane              | 0.0269            | 0.1046       | K. Klabunde and D. Burton, <i>J. Am. Chem. Soc.</i> , <b>1972</b> , 94, 5985–5990                                  |
| 66                   |     | Dichloromethane               | 0.0210            | 0.0797       | –                                                                                                                  |
| 67                   |     | Chloromethane                 | 0.0145            | 0.0517       | –                                                                                                                  |
| 68                   |     | Methane                       | 0.0047            | 0.0154       | –                                                                                                                  |
| 69                   |     | Trifluoromethane              | 0.0233            | 0.0942       | –                                                                                                                  |
| 70                   |     | Tribromomethane               | 0.0262            | 0.1015       | K. Klabunde and D. Burton, <i>J. Am. Chem. Soc.</i> , <b>1972</b> , 94, 5985–5990                                  |



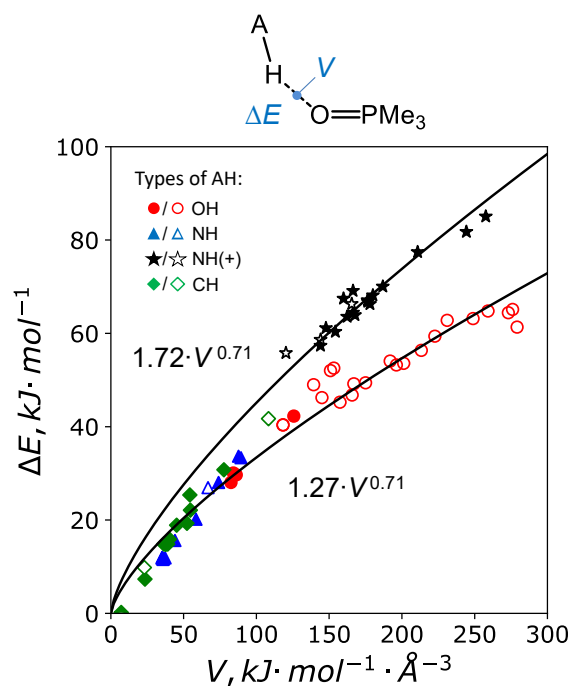

**Figure S15.** The complexes of  $\text{Me}_3\text{PO}$  in aprotic medium: correlation between  $\Delta E$  and  $V$ . Solid lines correspond to the result of least squares fitting of data points by the functions  $\Delta E = k \cdot V^{0.71}$ . The coefficient  $k$  is different for complexes with cationic and neutral AH molecules. The power equal to 0.71 was fixed due to strong correlation  $G(V)$  shown in Figure 11 and linear correlation  $\Delta E(G)$  shown in Figure 10.

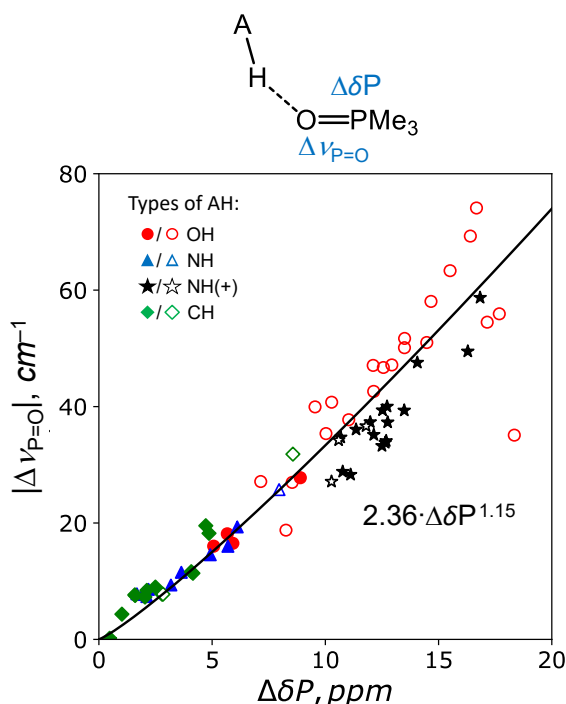

**Figure S16.** The complexes of  $\text{Me}_3\text{PO}$  in aprotic medium: correlation between  $|\Delta \nu_{\text{P}=\text{O}}|$  and  $\Delta \delta \text{P}$ . Solid line corresponds to the correlation function obtained as the results of least squares fitting of correlations  $G(|\Delta \nu_{\text{P}=\text{O}}|)$  shown in Figure 12 and  $G(\Delta \delta \text{P})$  shown in Figure 14. Correlation between  $|\Delta \nu_{\text{P}=\text{O}}|$  and  $\Delta \delta \text{P}$  is the same for both complexes with cationic and neutral AH molecules.

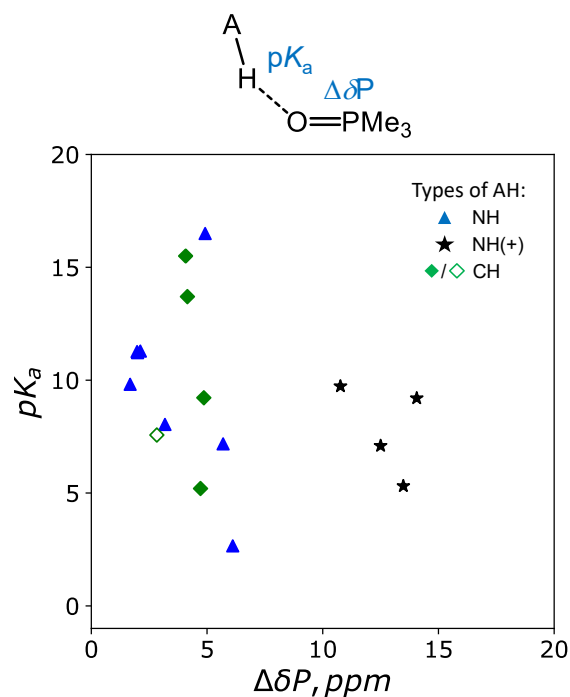

**Figure S17.** The complexes of  $\text{Me}_3\text{PO}$  in aprotic medium:  $\Delta\delta P$  and  $pK_a$  for NH,  $\text{NH}^+$  and CH proton donors. The values of  $pK_a$  are taken from the literature (see **Table S2**).

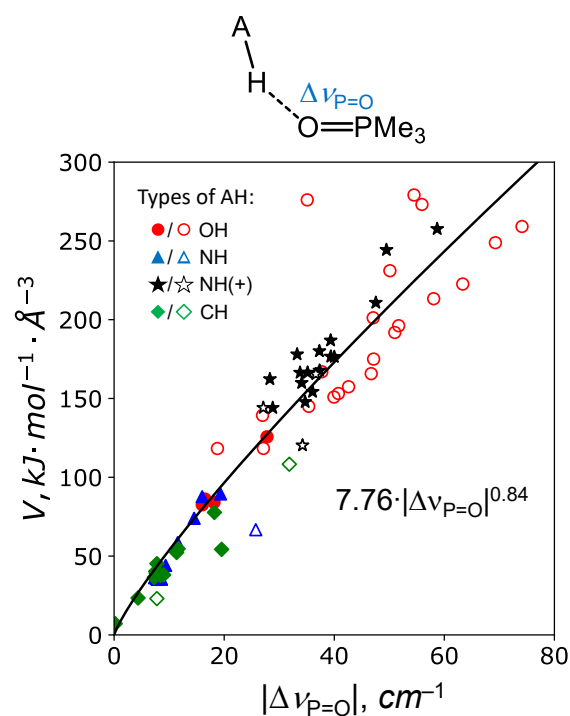

**Figure S18.** The complexes of  $\text{Me}_3\text{PO}$  in aprotic medium: correlation between  $V$  and  $|\Delta\nu_{\text{P=O}}|$ . Solid line corresponds to the result of least squares fitting of data points by the power function. The correlation  $V(|\Delta\nu_{\text{P=O}}|)$  is the same for both complexes with neutral and cationic molecules.

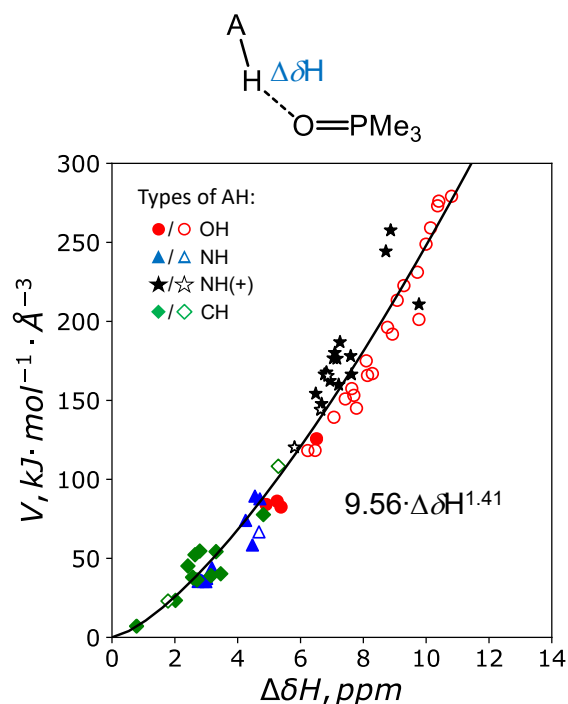

**Figure S19.** The complexes of  $\text{Me}_3\text{PO}$  in aprotic medium: correlation between  $V$  and  $\Delta\delta\text{H}$ . Solid line corresponds to the correlation function obtained as the results of least squares fitting of  $G(\Delta\delta\text{H})$  shown in Figure 13 and  $G(V)$  shown in Figure 11. The correlation  $V(\Delta\delta\text{H})$  is the same for both complexes with neutral and cationic molecules.

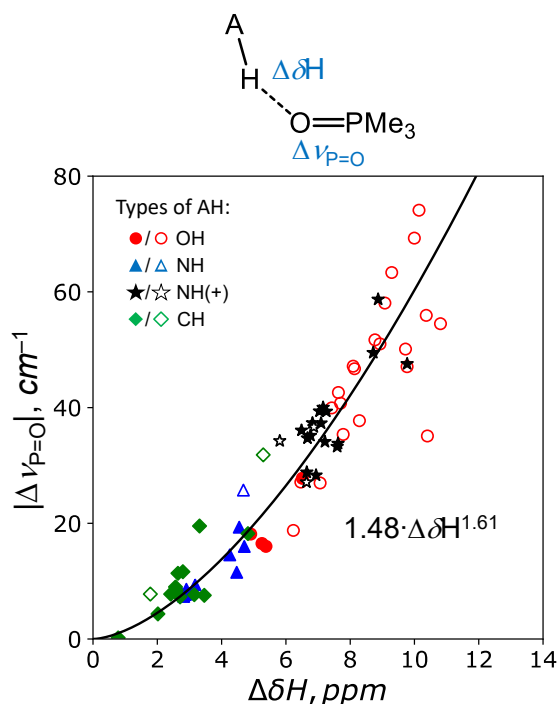

**Figure S20.** The complexes of  $\text{Me}_3\text{PO}$  in aprotic medium: correlation between  $|\Delta\nu_{\text{P=O}}|$  and  $\Delta\delta\text{H}$ . Solid line corresponds to the correlation function obtained as the results of least squares fitting of correlations  $G(|\Delta\nu_{\text{P=O}}|)$  shown in Figure 12 and  $G(\Delta\delta\text{H})$  shown in Figure 13. Correlation between  $|\Delta\nu_{\text{P=O}}|$  and  $\Delta\delta\text{H}$  is the same for both complexes with cationic and neutral AH molecules.

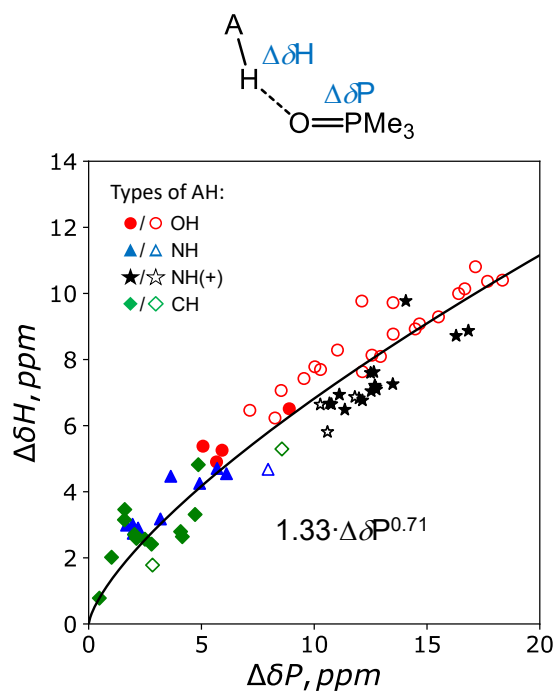

**Figure S21.** The complexes of  $\text{Me}_3\text{PO}$  in aprotic medium: correlation between  $\Delta\delta\text{H}$  and  $\Delta\delta\text{P}$ . Solid line corresponds to the correlation function obtained as the results of least squares fitting of correlations  $G(\Delta\delta\text{H})$  shown in Figure 13 and  $G(\Delta\delta\text{P})$  shown in Figure 14. Correlation between  $\Delta\delta\text{P}$  and  $\Delta\delta\text{H}$  is the same for both complexes with cationic and neutral AH molecules
